# Supplementary material
Source: PubMed Central journal article supplement (PMC4725271)
Supplement: AEM.03741-15_zam999116894so1.pdf [file AEM.03741-15_zam999116894so1.pdf]

**Query**

*Listeria* Genomic Island 1

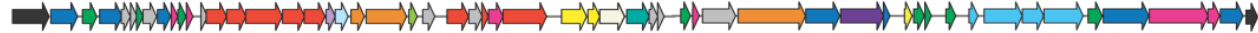

**Blastn results**

*Clostridium saccharolyticum* WM1  
E-value 0.0, Query coverage 61%

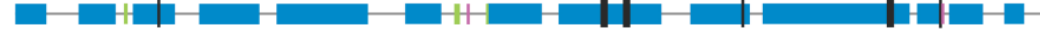

*Desulfotomaculum acetoxidans* DSM 771  
E-value 0.0, Query coverage 46%

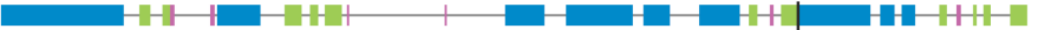

*Clostridium kluyveri* NBRC 12016  
E-value 0.0, Query coverage 57%

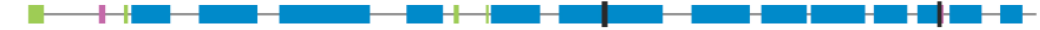

*Clostridium kluyveri* DSM 555  
E-value 0.0, Query coverage 57%

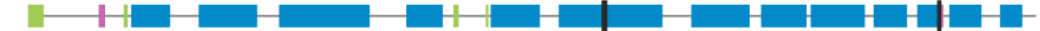

*Desulfitobacterium hafniense* Y51  
E-value 0.0, Query coverage 50%

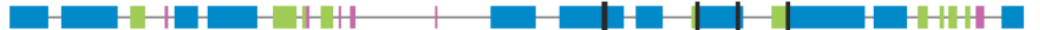

*Eubacterium rectale* DSM 17629  
E-value 0.0, Query coverage 33%

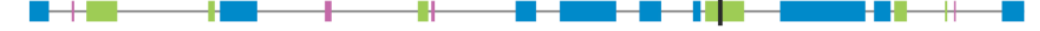

10kbp

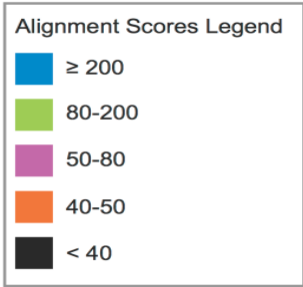

**FIG S1.** The blastn nucleotide sequence homology of LGI1 to the other publically available genomes in the NCBI database.

**Listeria monocytogenes 08-5578 (CP001602)**  
**Listeria monocytogenes 08-5923 (CP001604)**  
*Desulfitobacterium dehalogenans* ATCC 51507 (CP003348)  
 E-value 2x10<sup>-49</sup>, Query coverage 100%, Identity 74%  
*Desulfitobacterium hafniense* DCB-2 (CP001336)  
 E-value 1x10<sup>-38</sup>, Query coverage 100%, Identity 72%  
*Desulfitobacterium hafniense* Y51 (AP008230)  
 E-value 6x10<sup>-36</sup>, Query coverage 100%, Identity 71%  
*Desulfitobacterium hafniense* PCS-E (LK996017)  
 E-value 6x10<sup>-36</sup>, Query coverage 100%, Identity 71%  
*Clostridium scatologenes* ATCC 25775 (CP009933)  
 E-value 7x10<sup>-29</sup>, Query coverage 96%, Identity 70%  
*Clostridium ljungdahlii* DSM 13528 (CP001666)  
 E-value 1x10<sup>-24</sup>, Query coverage 99%, Identity 68%  
*Clostridium autoethanogenum* DSM 10061 (CP006763)  
 E-value 1x10<sup>-24</sup>, Query coverage 99%, Identity 68%

```

1      10      20      30      40      50      60
|      |      |      |      |      |
ATGGAATGGATTTTATTAGCAGTCGCTATCGTACTTGAACCTGTTGGAACAACATTGATG
ATGGAATGGATTTTATTAGCAGTCGCTATCGTACTTGAACCTGTTGGAACAACATTGATG
ATGCAATGGGTTTATTAGCCCTGGCTATTTACTTGAATTTTGGGACAACACTAATG
ATGCAATGGATTTATTAGCCCTGGCTATTTACTGAAATTTTGGGACAACACTGATG
ATGCAATGGGTTTACTTAGCCCTGGCTATTTACTGAAATTTTGGGACAACACTGATG
ATGCAATGGGTTTACTTAGCCCTGGCTATTTACTGAAATTTTGGGACAACACTGATG
ATGGAATGGATTTACCTTATTCTTGGCATTTTATTGAAATTGCAAGGAACAACATTAATG
-TGGAATGGATTTATCTAATTGGAGCTATTATACTTGAAACAATAAGGAACAACTTGTATG
-TGGAATGGATTTATCTAATTGGAGCTATTATACTTGAAACAATAAGGAACAACTTGTATG
  
```

**Listeria monocytogenes 08-5578 (CP001602)**  
**Listeria monocytogenes 08-5923 (CP001604)**  
*Desulfitobacterium dehalogenans* ATCC 51507 (CP003348)  
*Desulfitobacterium hafniense* DCB-2 (CP001336)  
*Desulfitobacterium hafniense* Y51 (AP008230)  
*Desulfitobacterium hafniense* PCS-E (LK996017)  
*Clostridium scatologenes* ATCC 25775 (CP009933)  
*Clostridium ljungdahlii* DSM 13528 (CP001666)  
*Clostridium autoethanogenum* DSM 10061 (CP006763)

```

61      70      80      90      100     110     120
|      |      |      |      |      |
AAAAATGTCGTATGGACTTACAAAAGCTATTACCAAGTGCAGGGAATGTTTCATAGCATTATATC
AAAAATGTCGTATGGACTTACAAAAGCTATTACCAAGTGCAGGGAATGTTTCATAGCATTATATC
AAAAATGTCGGATGGACTGACTAAAATGCTGCCACCGCAGGAATGTTCCCTGGCCTATGCTT
AAAAATGTCGGAGGGACTGACGAAAATGCTGCCAACGTTAGGGAATGTTTCTGGCCTATGTT
AAAAATGTCGGAGGGACTGACGAAAATGCTGCCAACGTTAGGGAATGTTCCCTGGCCTATGTT
AAAAATGTCGGAGGGACTGACGAAAATGCTGCCAACGTTAGGGAATGTTCCCTGGCCTATGTT
AAAGTGTCTTATGGGTTTACTAAAATATTGCCAATATAGGAACATTTTAGGTTATATA
AAGATGTCTGTATGGATTTACAAAATTACTGCCAGCTTTAGGAACAATTCCTAACGTATGGC
AAGATGTCTGTATGGATTTACAAAATTACTGCCAGCTTTAGGAACAATTCCTAACGTATGGC
  
```

**Listeria monocytogenes 08-5578 (CP001602)**  
**Listeria monocytogenes 08-5923 (CP001604)**  
*Desulfitobacterium dehalogenans* ATCC 51507 (CP003348)  
*Desulfitobacterium hafniense* DCB-2 (CP001336)  
*Desulfitobacterium hafniense* Y51 (AP008230)  
*Desulfitobacterium hafniense* PCS-E (LK996017)  
*Clostridium scatologenes* ATCC 25775 (CP009933)  
*Clostridium ljungdahlii* DSM 13528 (CP001666)  
*Clostridium autoethanogenum* DSM 10061 (CP006763)

```

121     130     140     150     160     170     180
|      |      |      |      |      |
CTATGTTTCGGTTCCTTAGCATTAGCATTAAAAAAAATACCGGTTAGTGCAGCATATGCTT
CTATGTTTCGGTTCCTTAGCATTAGCATTAAAAAAAATACCGGTTAGTGCAGCATATGCTT
TTATGTTTCGGTTCCTTAGCATTAGCATTAAAAAAAATACCGGTTAGTGCAGCATATGCTT
TTATGTTTCGGTTCCTTAGCATTAGCATTAAAAAAAATACCGGTTAGTGCAGCATATGCTT
TTATGTTTCGGTTCCTTAGCATTAGCATTAAAAAAAATACCGGTTAGTGCAGCATATGCTT
TTATGTTTCGGTTCCTTAGCATTAGCATTAAAAAAAATACCGGTTAGTGCAGCATATGCTT
ATATGCTTTATTTGTTTATCTATGGCGTTGAAAAAAAATAGATAAAGTGTGGCATATGCTT
TTGTGCTTTGTACTTTTTCAAATATCTTTAAAAAAGATACCTGTGAGTGTGGCATATGCTT
TTGTGCTTTGTACTTTTTCAAATATCTTTAAAAAAGATACCTGTGAGTGTGGCATATGCTT
  
```

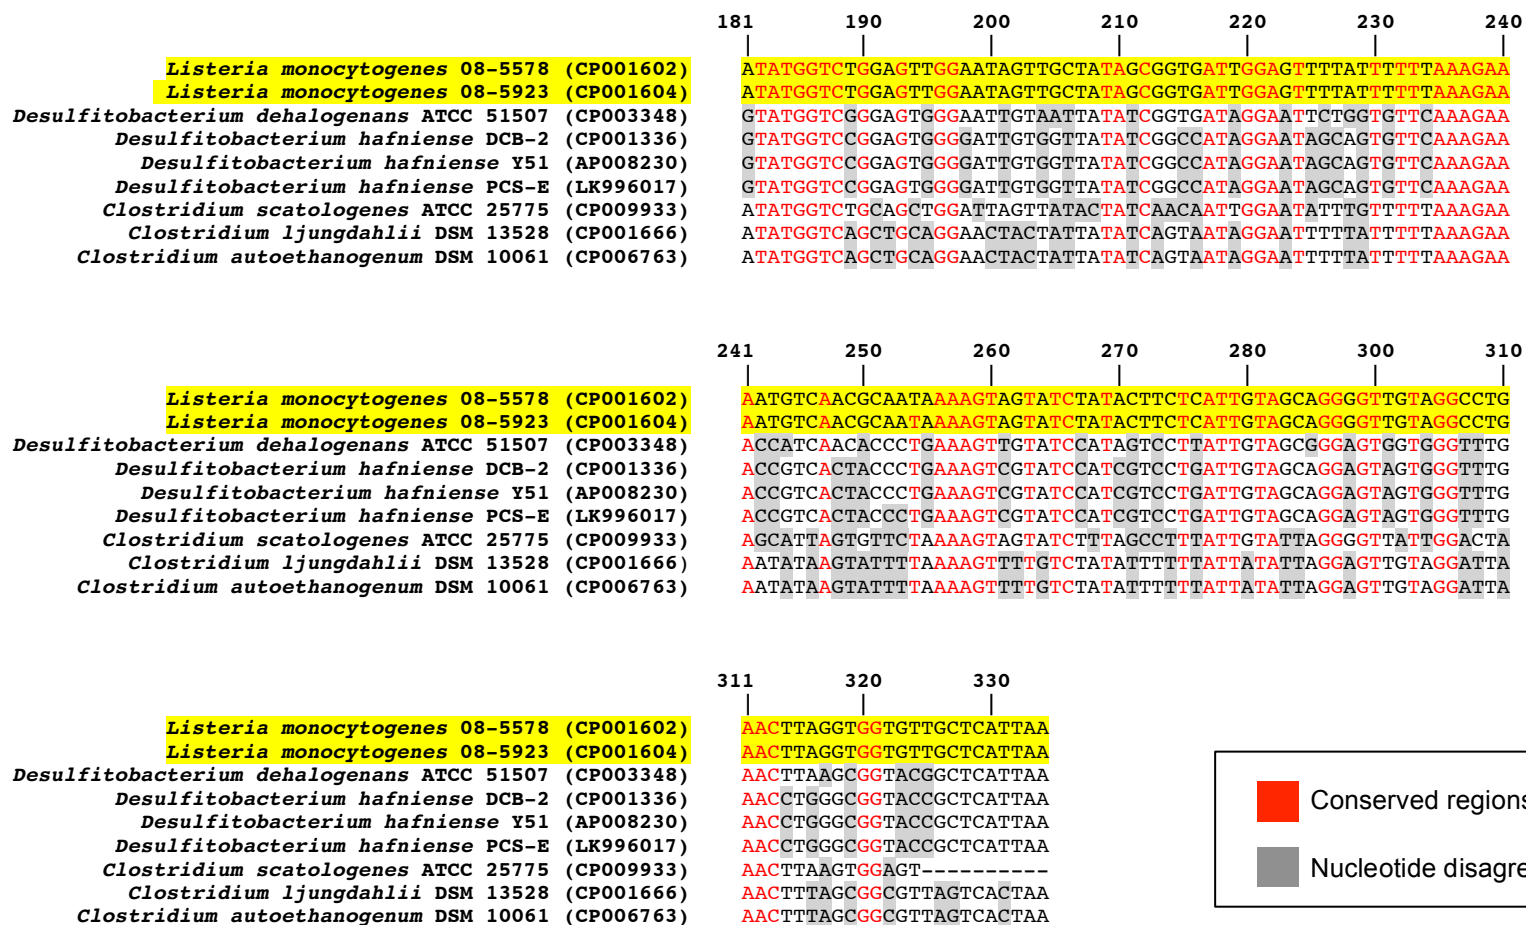

FIG S2. The blastn nucleotide sequence homology of *emrE<sub>Lm</sub>* (highlighted in yellow) to the other publicly available genomes in the NCBI database.

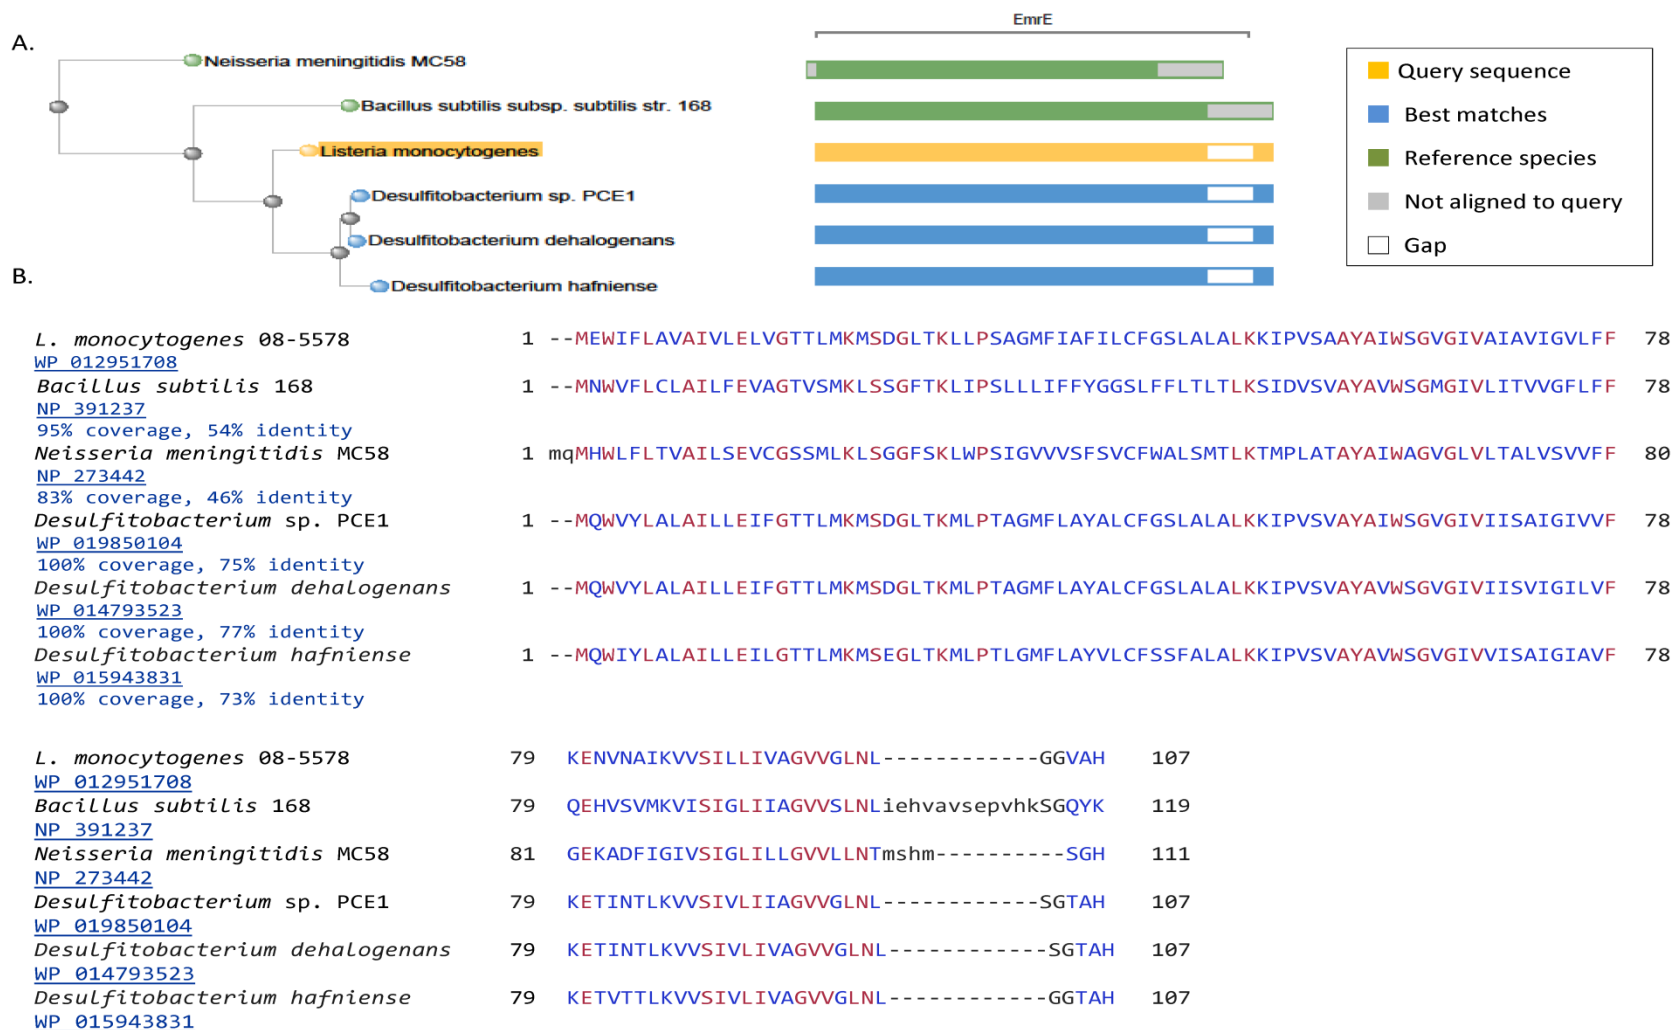

**FIG S3.** The graphic representation (A) and blastp protein sequence homology (B) of *emrE<sub>Lm</sub>* to the other publicly available proteins in the NCBI database obtained using SmartBlast. Reference species represent matches from well-studied species.
